# Supplementary material
Source: MDPI journal article supplement (https://www.mdpi.com/1999-4907/8/11/430)
Supplement: s1 [file s1]

**Supplementary Information for:**

Comparisons of soil properties, enzyme activities and microbial communities in heavy metal contaminated bulk and rhizosphere soils of *Robinia pseudoacacia* L. in the northern foot of Qinling Mountain

Yurong Yang 1, Miao Dong 1, Yaping Cao 1, Jinlong Wang 1, Ming Tang 2,3,* and Yihui Ban 3

1 State Environmental Protection Key Laboratory of Wetland Ecology and Vegetation Restoration, Key Laboratory of Vegetation Ecology, School of Environment, Northeast Normal University, Changchun, 130117, China; yangyr422@nenu.edu.cn (Y.Y.); [dongm005@nenu.edu.cn](mailto:dongm005@nenu.edu.cn) (M.D.); caoyp050@nenu.edu.cn (Y.C.); [wangjl215@nenu.edu.cn](mailto:wangjl215@nenu.edu.cn) (J.W.)

2State Key Laboratory for Conservation and Utilization of Subtropical Agro-bioresources (South China Agricultural University), Guangdong Key Laboratory for Innovative Development and Utilization of Forest Plant Germplasm, College of Forestry and Landscape Architecture, South China Agricultural University, Guangzhou 510642, China

3College of Forestry, Northwest A&F University, Yangling, Shaanxi 712100, China; [tangmingyl@163.com](mailto:tangm@nwsuaf.edu.cn) (M.T.); [banyihui7500@163.com](mailto:banyihui7500@163.com) (Y.B.)

* Correspondence: [tangmingyl@163.com](mailto:tangm@nwsuaf.edu.cn); Tel./Fax: +86-029-8708-0807


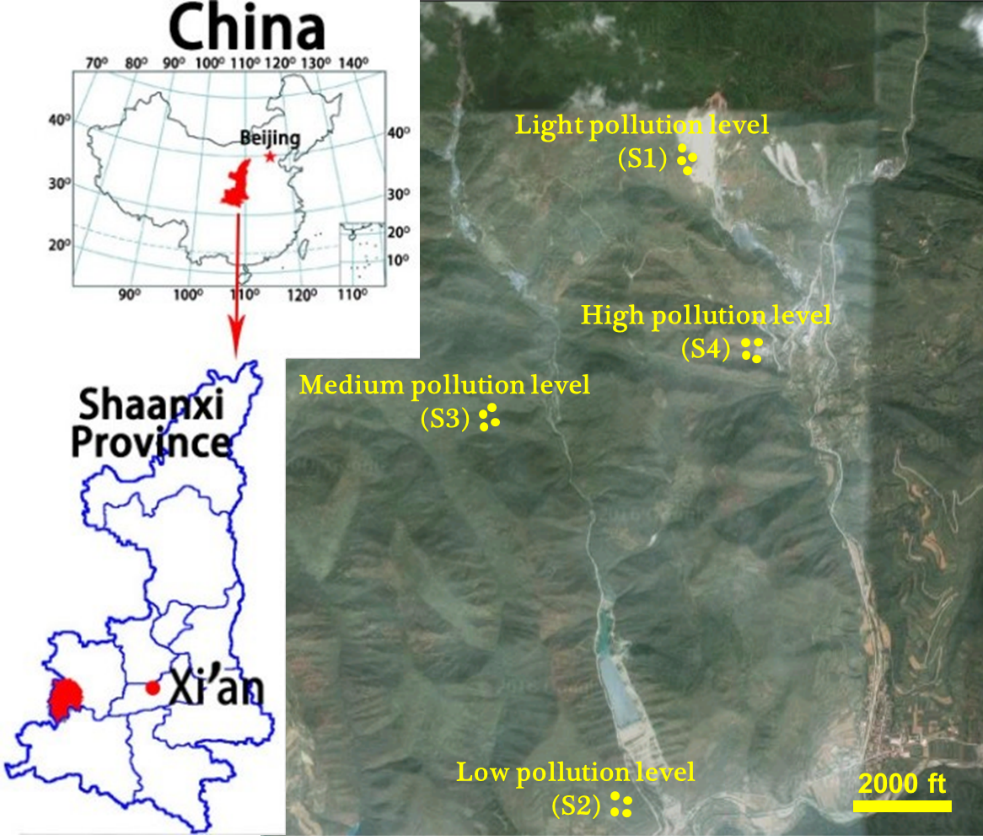


**Figure S1.** Simplified location map showing the four study sites with different pollution levels in heavy metal contaminated area. Light pollution level (S1): the mine (33°51.971′N, 106°39.311′E, 1493 m a.s.l.), mainly affected by air dust pollution; Low pollution level (S2): the tailing dam around the mine (33°49.811′N, 106°39.055′E, 1191 m a.s.l.), mainly affected by air dust pollution; Medium pollution level (S3): the wastewater ditch around the mine (33°51.288′N, 106°39.429′E, 1304 m a.s.l.), mainly affected by surface water pollution; High pollution level (S4): the abandoned smelter (33°51.290′N, 106°39.438′E, 1396 m a.s.l.), mainly polluted by the mist and dust discharged in the production process.





**Figure S1.** The availabilities of Pb and Zn in either bulk soil (BS) or rhizosphere soil (RS) at different heavy metal pollution levels. Each value is the mean ± SD (n = 4). Statistically significant differences in parameters between bulk and rhizosphere soils were analyzed using independent t test (***p* < 0.01; **p* < 0.05; ns, not significant).

**Table S1.** Correlational analysis among soil chemical properties and heavy metal concentrations in bulk and rhizosphere soils at different heavy metal pollution levels.

| Soil type | Heavy metal | Soil chemical properties | | | | | | | |
| --- | --- | --- | --- | --- | --- | --- | --- | --- | --- |
| pH | EC | SOM | SOC | TN | AN | TP | AP |
| BS | TPb | **-0.52*** | **0.69**** | **-0.76**** | **-0.84**** | -0.48ns | **-0.70**** | -0.28ns | **-0.63**** |
| DPb | **-0.62*** | **0.75**** | **-0.80**** | **-0.84**** | **-0.58*** | **-0.77**** | -0.45ns | **-0.73**** |
| TZn | -0.32ns | **0.67**** | **-0.59*** | **-0.69**** | -0.19ns | **-0.62*** | 0.01ns | -0.29ns |
| DZn | -0.38ns | **0.76**** | **-0.74**** | **-0.79**** | -0.29ns | **-0.72**** | -0.12ns | -0.44ns |
| Pb availability | **-0.59*** | **0.76**** | **-0.63**** | **-0.60*** | **-0.61*** | **-0.63**** | **-0.54**** | **-0.71**** |
| Zn availability | -0.16ns | 0.37ns | -0.38ns | -0.38ns | -0.10ns | -0.26ns | -0.43ns | **0.60*** |
| RS | TPb | -0.41ns | **0.85**** | **-0.85**** | **-0.63**** | **-0.64**** | **-0.65**** | **-0.55*** | **-0.79**** |
| DPb | -0.44ns | **0.85**** | **-0.82**** | **-0.66**** | **-0.63**** | **-0.65**** | **-0.57*** | **-0.78**** |
| TZn | -0.11ns | **0.76**** | -0.38ns | **-0.59*** | -0.34ns | -0.32ns | -0.47ns | -0.42ns |
| DZn | -0.25ns | **0.84**** | -0.38ns | **-0.63**** | -0.33ns | -0.33ns | **-0.50*** | -0.38ns |
| Pb availability | -0.34ns | 0.13ns | 0.01ns | -0.32ns | -0.03ns | 0.07ns | -0.10ns | -0.19ns |
| Zn availability | **-0.50*** | **0.69**** | -0.40ns | -0.47ns | -0.34ns | -0.29ns | -0.34ns | -0.35ns |

BS, bulk soil; RS, rhizosphere soil; EC, electrical conductivity; SOM, soil organic matter; SOC, soil organic carbon; TN, total nitrogen; AN, available N; TP, total phosphorus; AP, available phosphorus; TPb, total Pb; TZn, total Zn; DPb, DTPA-extractable Pb; DZn, DTPA-extractable Pb. ***p* < 0.01; **p* < 0.05; ns, not significant.

**Table S2.** Correlational analysis among enzyme activities and soil chemical properties in bulk and rhizosphere soils at different heavy metal pollution levels.

| Soil properties | Enzyme activities | | | | | | | |
| --- | --- | --- | --- | --- | --- | --- | --- | --- |
| Bulk soil | | | | Rhizosphere soil | | | |
| GLU | PRO | URE | ALP | GLU | PRO | URE | ALP |
| pH | **0.65**** | **0.66**** | **0.53*** | 0.26ns | 0.09ns | 0.01ns | 0.36NS | 0.02ns |
| EC | **-0.79**** | **-0.72**** | **-0.69**** | **-0.49**** | **-0.69**** | **-0.83**** | **-0.78**** | **-0.65**** |
| SOM | **0.78**** | **0.80**** | **0.75**** | **0.57*** | **0.66**** | **0.57*** | **0.51*** | 0.27ns |
| SOC | **0.80**** | **0.67**** | **0.86**** | 0.45ns | 0.47ns | **0.64**** | 0.45NS | **0.63**** |
| TN | 0.18ns | 0.40ns | 0.49ns | 0.13ns | **0.54*** | 0.46ns | **0.52*** | 0.26ns |
| AN | **0.74**** | **0.69**** | **0.82**** | 0.45ns | **0.60*** | **0.64**** | **0.50*** | **0.58*** |
| TP | 0.27ns | **0.58*** | 0.34ns | 0.31ns | **0.73**** | **0.52*** | **0.54*** | 0.45ns |
| AP | **0.56*** | **0.50*** | **0.63*** | 0.15ns | **0.70**** | **0.57*** | **0.68**** | 0.25ns |
| TPb | **-0.82**** | **-0.70**** | **-0.88**** | -0.31ns | **-0.76**** | **-0.78**** | **-0.82**** | -0.48ns |
| DPb | **-0.82**** | **-0.78**** | **-0.87**** | -0.45ns | **-0.70**** | **-0.74**** | **-0.77**** | **-0.51*** |
| TZn | **-0.77**** | **-0.55*** | **-0.71**** | -0.47ns | **-0.63**** | **-0.78**** | **-0.81**** | **-0.52*** |
| DZn | **-0.88**** | **-0.64**** | **-0.83**** | -0.49ns | **-0.56*** | **-0.73**** | **-0.81**** | **-0.54*** |

BS, bulk soil; RS, rhizosphere soil; GLU, β-glucosidase; PRO, protease; URE, urease; ALP, alkaline phosphatase; EC, electrical conductivity; SOM, soil organic matter; SOC, soil organic carbon; TN, total nitrogen; AN, available nitrogen; TP, total phosphorus; AP, available phosphorus; TPb, total Pb; TZn, total Zn; DPb, DTPA-extractable Pb; DZn, DTPA-extractable Zn. ***p* < 0.01; **p* < 0.05; ns, not significant.

**Table S3.** Correlational analysis among bacterial abundance and soil chemical properties in bulk and rhizosphere soils at different heavy metal pollution levels.

| Soil properties | Bacterial abundance | |
| --- | --- | --- |
| Bulk soil | Rhizosphere soil |
| pH | **0.558*** | 0.459ns |
| EC | **-0.631**** | -0.481ns |
| SOM | **0.867**** | 0.485ns |
| SOC | **0.643**** | 0.417ns |
| TN | 0.352ns | 0.461ns |
| AN | **0.779**** | **0.591*** |
| TP | 0.255ns | **0.578*** |
| AP | 0.375ns | **0.585*** |
| TPb | **-0.772**** | **-0.582*** |
| DPb | **-0.790**** | **-0.646**** |
| TZn | **-0.657**** | -0.288ns |
| DZn | **-0.794**** | -0.327ns |

BS, bulk soil; RS, rhizosphere soil; EC, electrical conductivity; SOM, soil organic matter; SOC, soil organic carbon; TN, total nitrogen; AN, available nitrogen; TP, total phosphorus; AP, available phosphorus; TPb, total Pb; TZn, total Zn; DPb, DTPA-extractable Pb; DZn, DTPA-extractable Zn. ***p* < 0.01; **p* < 0.05; ns, not significant.

**Table S4.** Sequences of clone name, GenBank accession number, nearest BLAST matche and similarity identified from four study sites with different heavy metal pollution levels.

| Clone | Accession no. | Nearest BLAST matches | Similarity (%) |
| --- | --- | --- | --- |
| NR-S1-002 | KP162186 | AB821137 Uncultured bacterium | 99% |
| NR-S1-007 | KP162187 | DQ451452 Uncultured alphaproteobacterium | 99% |
| NR-S1-080 | KP162188 | KF192512 *Diaphorobacter* sp. | 99% |
| NR-S3-016 | KP162189 | KF192512 *Diaphorobacter* sp. | 99% |
| NR-S1-037 | KP162190 | DQ337592 *Herbaspirillum* sp. | 99% |
| NR-S1-019 | KP162191 | AY174112 *Agrobacterium* sp. | 99% |
| NR-S3-028 | KP162192 | KF150504 *Microbacterium oxydans* | 99% |
| NR-S1-035 | KP162193 | KF717080 Uncultured *Pseudomonas* sp. | 99% |
| R-S4-079 | KP162194 | GQ288420 *Arthrobacter* sp. | 98% |
| R-S4-012 | KP162195 | GQ288420 *Arthrobacter* sp. | 98% |
| NR-S2-009 | KP162196 | KC683148 Uncultured bacterium | 98% |
| NR-S1-067 | KP162197 | AB672155 Uncultured bacterium | 96% |
| NR-S1-103 | KP162198 | AB672155 Uncultured bacterium | 96% |
| NR-S2-014 | KP162199 | GU385868 *Lysobacter* sp. | 97% |
| NR-S1-017 | KP162200 | EF687714 *Lysobacter* sp. | 98% |
| NR-S2-016 | KP162201 | JQ978531 Uncultured bacterium | 99% |
| NR-S3-059 | KP162202 | EF216351 *Nocardia* sp. | 99% |
| NR-S2-041 | KP162203 | EU861872 Uncultured soil bacterium | 98% |
| NR-S1-011 | KP162204 | EU861872 Uncultured soil bacterium | 96% |
| NR-S1-001 | KP162205 | EU861872 Uncultured soil bacterium | 97% |
| R-S2-039 | KP162206 | KC172254 Uncultured *Flavisolibacter* sp. | 98% |
| R-S2-011 | KP162207 | JX489904 Uncultured soil bacterium | 97% |
| R-S1-085 | KP162208 | JX489904 Uncultured soil bacterium | 93% |
| R-S1-079 | KP162209 | KC172311 Uncultured Planctomycetales bacterium | 98% |
| R-S1-015 | KP162210 | JF833550 Uncultured Planctomycete bacterium | 98% |
| NR-S1-141 | KP162211 | KF956620 *Bacillus* sp. | 99% |
| NR-S1-091 | KP162212 | KF956620 *Bacillus* sp. | 99% |
| NR-S1-085 | KP162213 | JX125574 *Chloroflexus* sp. | 98% |
| NR-S2-073 | KP162214 | JX125574 *Chloroflexus* sp. | 97% |
| NR-S1-029 | KP162215 | HQ132418 Uncultured *Clostridium* sp. | 99% |
| NR-S2-052 | KP162216 | HQ132418 Uncultured *Clostridium* sp. | 99% |
